# Supplementary material for: The Use of Crystal Violet Degradation Products for Ballpoint Pen Ink Manuscript Dating
Source: MDPI journal article supplement (doi:10.3390/molecules28176429), 2023-09-04
Supplement: s1 [file s1]

**Table S1.** Blue Innoxchrom®: Person, Tau B and Rho Spearman correlations. Level of significance given in brackets.

| <i>Variables<br/>(Est y p-valor)</i> |              | Phenol (PH)           | NNDAB                 | NNAPH                     | Michler<br>Ketone         | Victoria Blue R           | Ethyl Violet               | Penta-PRS                  | Tetra-PRS                  | Tri-PRS                    | Di-PRS                     |
|--------------------------------------|--------------|-----------------------|-----------------------|---------------------------|---------------------------|---------------------------|----------------------------|----------------------------|----------------------------|----------------------------|----------------------------|
| Time (Month)                         | Pearson      | <b>-.473* (.023)</b>  | <b>-.526** (.010)</b> | <b>-.678** (.000)</b>     | <b>-.558** (.006)</b>     | <b>-.869** (.000)</b>     | .119 <sup>NS</sup> (.589)  | .390 <sup>NS</sup> (.066)  | .019 <sup>NS</sup> (.931)  | <b>.607** (.002)</b>       | -.316 <sup>NS</sup> (.142) |
|                                      | Tau B        | <b>-.500** (.001)</b> | <b>-.692** (.000)</b> | <b>-.478** (.001)</b>     | <b>-.415** (.006)</b>     | <b>-.796** (.000)</b>     | .013 <sup>NS</sup> (.935)  | <b>.344* (.022)</b>        | -.241 <sup>NS</sup> (.107) | <b>.464** (.004)</b>       | <b>-.344* (.022)</b>       |
|                                      | Rho Spearman | <b>-.650** (.001)</b> | <b>-.838** (.000)</b> | <b>-.723** (.000)</b>     | <b>-.549** (.007)</b>     | <b>-.920** (.000)</b>     | .013 <sup>NS</sup> (.953)  | <b>.448* (.032)</b>        | -.320 <sup>NS</sup> (.136) | <b>.625** (.001)</b>       | -.400 <sup>NS</sup> (.058) |
|                                      | Covariance   | -.153                 | -.050                 | -.418                     | -.127                     | -.874                     | .086                       | 16.057                     | .073                       | 2.164                      | -.655                      |
| Phenol (PH)                          | Pearson      |                       | <b>.918** (.000)</b>  | .355 <sup>NS</sup> (.096) | .108 <sup>NS</sup> (.624) | .364 <sup>NS</sup> (.087) | -.068 <sup>NS</sup> (.756) | -.189 <sup>NS</sup> (.387) | -.042 <sup>NS</sup> (.848) | -.375 <sup>NS</sup> (.078) | .093 <sup>NS</sup> (.673)  |
|                                      | Tau B        |                       | <b>.515** (.002)</b>  | <b>.436** (.004)</b>      | .268 <sup>NS</sup> (.076) | <b>.377* (.013)</b>       | .144 <sup>NS</sup> (.357)  | -.004 <sup>NS</sup> (.979) | .212 <sup>NS</sup> (.160)  | -.242 <sup>NS</sup> (.136) | .196 <sup>NS</sup> (.194)  |
|                                      | Rho Spearman |                       | <b>.620** (.002)</b>  | <b>.577** (.004)</b>      | .334 <sup>NS</sup> (.120) | .481* (.020)              | .163 <sup>NS</sup> (.456)  | -.033 <sup>NS</sup> (.881) | .307 <sup>NS</sup> (.155)  | -.329 <sup>NS</sup> (.125) | .247 <sup>NS</sup> (.256)  |
|                                      | Covariance   |                       | .000                  | .000                      | .000                      | .000                      | .000                       | -.002                      | .000                       | .000                       | .000                       |
| NNDAB                                | Pearson      |                       |                       | .411 <sup>NS</sup> (.051) | .284 <sup>NS</sup> (.189) | <b>.466* (.025)</b>       | -.148 <sup>NS</sup> (.502) | -.304 <sup>NS</sup> (.158) | -.025 <sup>NS</sup> (.910) | <b>-.488* (.018)</b>       | .223 <sup>NS</sup> (.307)  |
|                                      | Tau B        |                       |                       | <b>.425** (.010)</b>      | <b>.356* (.030)</b>       | <b>.620** (.000)</b>      | -.037 <sup>NS</sup> (.829) | <b>-.454** (.006)</b>      | .178 <sup>NS</sup> (.278)  | <b>-.569** (.001)</b>      | .316 <sup>NS</sup> (.054)  |
|                                      | Rho Spearman |                       |                       | <b>.544** (.007)</b>      | <b>.467* (.025)</b>       | <b>.791** (.000)</b>      | -.045 <sup>NS</sup> (.838) | <b>-.569** (.005)</b>      | .277 <sup>NS</sup> (.201)  | <b>-.689** (.000)</b>      | <b>.439* (.036)</b>        |
|                                      | Covariance   |                       |                       | .000                      | .000                      | .000                      | .000                       | -.001                      | .000                       | .000                       | .000                       |
| NNAPH                                | Pearson      |                       |                       |                           | <b>.482* (.020)</b>       | <b>.644** (.001)</b>      | .040 <sup>NS</sup> (.857)  | -.249 <sup>NS</sup> (.251) | .020 <sup>NS</sup> (.929)  | <b>-.475* (.022)</b>       | .241 <sup>NS</sup> (.269)  |
|                                      | Tau B        |                       |                       |                           | <b>.447** (.003)</b>      | <b>.452** (.003)</b>      | .155 <sup>NS</sup> (.317)  | -.154 <sup>NS</sup> (.303) | .194 <sup>NS</sup> (.196)  | <b>-.326* (.042)</b>       | .265 <sup>NS</sup> (.077)  |
|                                      | Rho Spearman |                       |                       |                           | <b>.574** (.004)</b>      | <b>.636** (.001)</b>      | .200 <sup>NS</sup> (.359)  | -.224 <sup>NS</sup> (.304) | .263 <sup>NS</sup> (.226)  | <b>-.464* (.026)</b>       | .330 <sup>NS</sup> (.124)  |
|                                      | Covariance   |                       |                       |                           | .000                      | .000                      | .000                       | -.006                      | .000                       | -.001                      | .000                       |
| Michler Ketone                       | Pearson      |                       |                       |                           |                           | <b>.565** (.005)</b>      | -.238 <sup>NS</sup> (.274) | .038 <sup>NS</sup> (.862)  | <b>.602** (.002)</b>       | -.302 <sup>NS</sup> (.162) | <b>.885** (.000)</b>       |
|                                      | Tau B        |                       |                       |                           |                           | <b>.532** (.000)</b>      | .029 <sup>NS</sup> (.850)  | -.154 <sup>NS</sup> (.303) | <b>.636** (.000)</b>       | -.198 <sup>NS</sup> (.218) | <b>.723** (.000)</b>       |
|                                      | Rho Spearman |                       |                       |                           |                           | <b>.718** (.000)</b>      | .017 <sup>NS</sup> (.940)  | -.300 <sup>NS</sup> (.164) | <b>.829** (.000)</b>       | -.315 <sup>NS</sup> (.143) | <b>.899** (.000)</b>       |
|                                      | Covariance   |                       |                       |                           |                           | .000                      | .000                       | .000                       | .000                       | .000                       | .000                       |
| Victoria Blue R                      | Pearson      |                       |                       |                           |                           |                           | -.179 <sup>NS</sup> (.415) | <b>-.435* (.038)</b>       | -.023 <sup>NS</sup> (.916) | <b>-.521* (.011)</b>       | .335 <sup>NS</sup> (.118)  |
|                                      | Tau B        |                       |                       |                           |                           |                           | -.064 <sup>NS</sup> (.684) | <b>-.428** (.005)</b>      | <b>.364* (.016)</b>        | <b>-.423** (.009)</b>      | <b>.492** (.001)</b>       |
|                                      | Rho Spearman |                       |                       |                           |                           |                           | -.097 <sup>NS</sup> (.658) | <b>-.503* (.014)</b>       | <b>.501* (.015)</b>        | <b>-.568** (.005)</b>      | <b>.611** (.002)</b>       |
|                                      | Covariance   |                       |                       |                           |                           |                           | .000                       | -.017                      | .000                       | -.002                      | .001                       |
| Ethyl Violet                         | Pearson      |                       |                       |                           |                           |                           |                            | .390 <sup>NS</sup> (.066)  | .081 <sup>NS</sup> (.714)  | .347 <sup>NS</sup> (.105)  | -.247 <sup>NS</sup> (.256) |
|                                      | Tau B        |                       |                       |                           |                           |                           |                            | <b>.306* (.048)</b>        | .046 <sup>NS</sup> (.766)  | .205 <sup>NS</sup> (.219)  | -.013 <sup>NS</sup> (.935) |
|                                      | Rho Spearman |                       |                       |                           |                           |                           |                            | .391 <sup>NS</sup> (.065)  | .057 <sup>NS</sup> (.796)  | .225 <sup>NS</sup> (.302)  | -.080 <sup>NS</sup> (.716) |
|                                      | Covariance   |                       |                       |                           |                           |                           |                            | .011                       | .000                       | .001                       | .000                       |
| Penta-PRS                            | Pearson      |                       |                       |                           |                           |                           |                            |                            | <b>.774** (.000)</b>       | <b>.801** (.000)</b>       | .292 <sup>NS</sup> (.176)  |
|                                      | Tau B        |                       |                       |                           |                           |                           |                            |                            | .004 <sup>NS</sup> (.979)  | <b>.639** (.000)</b>       | -.178 <sup>NS</sup> (.235) |
|                                      | Rho Spearman |                       |                       |                           |                           |                           |                            |                            | .046 <sup>NS</sup> (.833)  | <b>.786** (.000)</b>       | -.243 <sup>NS</sup> (.264) |
|                                      | Covariance   |                       |                       |                           |                           |                           |                            |                            | .116                       | .111                       | .024                       |
| Tetra-PRS                            | Pearson      |                       |                       |                           |                           |                           |                            |                            |                            | .397 <sup>NS</sup> (.061)  | <b>.830** (.000)</b>       |
|                                      | Tau B        |                       |                       |                           |                           |                           |                            |                            |                            | .032 <sup>NS</sup> (.841)  | <b>.818** (.000)</b>       |
|                                      | Rho Spearman |                       |                       |                           |                           |                           |                            |                            |                            | .056 <sup>NS</sup> (.800)  | <b>.919** (.000)</b>       |
|                                      | Covariance   |                       |                       |                           |                           |                           |                            |                            |                            | .005                       | .006                       |
| Tri-PRS                              | Pearson      |                       |                       |                           |                           |                           |                            |                            |                            |                            | -.095 <sup>NS</sup> (.666) |
|                                      | Tau B        |                       |                       |                           |                           |                           |                            |                            |                            |                            | -.097 <sup>NS</sup> (.548) |
|                                      | Rho Spearman |                       |                       |                           |                           |                           |                            |                            |                            |                            | -.198 <sup>NS</sup> (.366) |
|                                      | Covariance   |                       |                       |                           |                           |                           |                            |                            |                            |                            | -.001                      |

<sup>NS</sup> = NO significant \* =Significant \*\* = Highly significant.

**Table S2.** Black Innoxchrom®: Person, Tau B and Rho Spearman correlations. Level of significance given in brackets.

| <i>Variables<br/>(Est y p-valor)</i> |              | Phenol (PH)           | NNDAB                      | NNAPH                      | Metanil Yellow             | Ethyl Violet               | Penta-PRS                  | Tetra-PRS                  | Tri-PRS                    | Di-PRS                     |
|--------------------------------------|--------------|-----------------------|----------------------------|----------------------------|----------------------------|----------------------------|----------------------------|----------------------------|----------------------------|----------------------------|
| Time (Month)                         | Pearson      | <b>-.610** (.001)</b> | .281 <sup>NS</sup> (.174)  | <b>-.523** (.007)</b>      | -.325 <sup>NS</sup> (.113) | -.086 <sup>NS</sup> (.683) | <b>-.932** (.000)</b>      | <b>-.818** (.000)</b>      | -.133 <sup>NS</sup> (.526) | <b>-.646** (.000)</b>      |
|                                      | Tau B        | <b>-.727** (.000)</b> | .293 <sup>NS</sup> (.063)  | -.140 <sup>NS</sup> (.327) | -.073 <sup>NS</sup> (.607) | -.116 <sup>NS</sup> (.454) | <b>-.720** (.000)</b>      | <b>-.580** (.000)</b>      | -.117 <sup>NS</sup> (.413) | <b>-.507** (.000)</b>      |
|                                      | Rho Spearman | <b>-.878** (.000)</b> | <b>.405* (.045)</b>        | -.314 <sup>NS</sup> (.127) | -.229 <sup>NS</sup> (.270) | -.118 <sup>NS</sup> (.574) | <b>-.865** (.000)</b>      | <b>-.748** (.000)</b>      | -.120 <sup>NS</sup> (.567) | <b>-.672** (.000)</b>      |
|                                      | Covariance   | -.112                 | .003                       | -.095                      | -2.354                     | -.022                      | -37.039                    | -1.993                     | -.212                      | -.904                      |
| Phenol (PH)                          | Pearson      |                       | .007 <sup>NS</sup> (.972)  | .358 <sup>NS</sup> (.079)  | -.050 <sup>NS</sup> (.812) | -.127 <sup>NS</sup> (.547) | <b>.535** (.006)</b>       | <b>.639** (.001)</b>       | -.174 <sup>NS</sup> (.404) | <b>.619** (.001)</b>       |
|                                      | Rho Spearman |                       | -.198 <sup>NS</sup> (.209) | .227 <sup>NS</sup> (.112)  | .120 <sup>NS</sup> (.400)  | .004 <sup>NS</sup> (.979)  | <b>.607** (.000)</b>       | <b>.653** (.000)</b>       | .204 <sup>NS</sup> (.154)  | <b>.593** (.000)</b>       |
|                                      | Tau B        |                       | -.279 <sup>NS</sup> (.176) | <b>.396* (.05)</b>         | .225 <sup>NS</sup> (.279)  | -.036 <sup>NS</sup> (.866) | <b>.818** (.000)</b>       | <b>.842** (.000)</b>       | .226 <sup>NS</sup> (.278)  | <b>.777** (.000)</b>       |
|                                      | Covariance   |                       | .000                       | .000                       | .000                       | .000                       | .004                       | .000                       | .000                       | .000                       |
| NNDAB                                | Pearson      |                       |                            | -.254 <sup>NS</sup> (.220) | <b>-.461* (.020)</b>       | .236 <sup>NS</sup> (.256)  | -.352 <sup>NS</sup> (.084) | <b>-.406* (.044)</b>       | -.154 <sup>NS</sup> (.463) | -.389 <sup>NS</sup> (.055) |
|                                      | Rho Spearman |                       |                            | -.224 <sup>NS</sup> (.155) | <b>-.422** (.007)</b>      | .093 <sup>NS</sup> (.588)  | <b>-.318* (.043)</b>       | <b>-.448** (.004)</b>      | -.208 <sup>NS</sup> (.189) | <b>-.422** (.007)</b>      |
|                                      | Tau B        |                       |                            | -.280 <sup>NS</sup> (.176) | <b>-.552** (.004)</b>      | .122 <sup>NS</sup> (.561)  | <b>-.405* (.045)</b>       | <b>-.551** (.004)</b>      | -.245 <sup>NS</sup> (.237) | <b>-.535** (.006)</b>      |
|                                      | Covariance   |                       |                            | .000                       | .000                       | .000                       | .000                       | .000                       | .000                       | .000                       |
| NNAPH                                | Pearson      |                       |                            |                            | <b>.582** (.002)</b>       | -.243 <sup>NS</sup> (.241) | <b>.533** (.006)</b>       | <b>.559** (.004)</b>       | .206 <sup>NS</sup> (.323)  | <b>.535** (.006)</b>       |
|                                      | Rho Spearman |                       |                            |                            | <b>.387** (.007)</b>       | -.100 <sup>NS</sup> (.519) | .127 <sup>NS</sup> (.375)  | <b>.347* (.015)</b>        | .191 <sup>NS</sup> (.183)  | <b>.340* (.017)</b>        |
|                                      | Tau B        |                       |                            |                            | <b>.577** (.003)</b>       | -.144 <sup>NS</sup> (.491) | .305 <sup>NS</sup> (.139)  | <b>.486* (.014)</b>        | .259 <sup>NS</sup> (.210)  | <b>.472* (.017)</b>        |
|                                      | Covariance   |                       |                            |                            | .001                       | .000                       | .004                       | .000                       | .000                       | .000                       |
| Metanil Yellow                       | Pearson      |                       |                            |                            |                            | -.240 <sup>NS</sup> (.248) | <b>.497* (.011)</b>        | <b>.490* (.013)</b>        | .329 <sup>NS</sup> (.108)  | <b>.440* (.028)</b>        |
|                                      | Rho Spearman |                       |                            |                            |                            | -.124 <sup>NS</sup> (.423) | .273 <sup>NS</sup> (.055)  | <b>.387** (.007)</b>       | <b>.332* (.021)</b>        | <b>.353* (.013)</b>        |
|                                      | Tau B        |                       |                            |                            |                            | -.196 <sup>NS</sup> (.349) | <b>.412* (.041)</b>        | <b>.571** (.003)</b>       | <b>.486* (.014)</b>        | <b>.544** (.005)</b>       |
|                                      | Covariance   |                       |                            |                            |                            | .000                       | .138                       | .008                       | .004                       | .004                       |
| Ethyl Violet                         | Pearson      |                       |                            |                            |                            |                            | .095 <sup>NS</sup> (.650)  | -.297 <sup>NS</sup> (.149) | -.157 <sup>NS</sup> (.455) | <b>-.496* (.012)</b>       |
|                                      | Rho Spearman |                       |                            |                            |                            |                            | .140 <sup>NS</sup> (.366)  | -.156 <sup>NS</sup> (.314) | -.092 <sup>NS</sup> (.552) | -.260 <sup>NS</sup> (.093) |
|                                      | Tau B        |                       |                            |                            |                            |                            | .169 <sup>NS</sup> (.421)  | -.315 <sup>NS</sup> (.126) | -.191 <sup>NS</sup> (.361) | <b>-.432* (.031)</b>       |
|                                      | Covariance   |                       |                            |                            |                            |                            | .001                       | .000                       | .000                       | .000                       |
| Penta-PRS                            | Pearson      |                       |                            |                            |                            |                            |                            | <b>.854** (.000)</b>       | .313 <sup>NS</sup> (.128)  | <b>.654** (.000)</b>       |
|                                      | Rho Spearman |                       |                            |                            |                            |                            |                            | <b>.580** (.000)</b>       | <b>.318* (.026)</b>        | <b>.493** (.001)</b>       |
|                                      | Tau B        |                       |                            |                            |                            |                            |                            | <b>.781** (.000)</b>       | <b>.479* (.015)</b>        | <b>.688** (.000)</b>       |
|                                      | Covariance   |                       |                            |                            |                            |                            |                            | .080                       | .019                       | .035                       |
| Tetra-PRS                            | Pearson      |                       |                            |                            |                            |                            |                            |                            | .318 <sup>NS</sup> (.121)  | <b>.948** (.000)</b>       |
|                                      | Rho Spearman |                       |                            |                            |                            |                            |                            |                            | <b>.439** (.002)</b>       | <b>.887** (.000)</b>       |
|                                      | Tau B        |                       |                            |                            |                            |                            |                            |                            | <b>.430* (.032)</b>        | <b>.970** (.000)</b>       |
|                                      | Covariance   |                       |                            |                            |                            |                            |                            |                            | .001                       | .003                       |
| Tri-PRS                              | Pearson      |                       |                            |                            |                            |                            |                            |                            |                            | .270 <sup>NS</sup> (.191)  |
|                                      | Rho Spearman |                       |                            |                            |                            |                            |                            |                            |                            | <b>.486** (.001)</b>       |
|                                      | Tau B        |                       |                            |                            |                            |                            |                            |                            |                            | <b>.431* (.031)</b>        |
|                                      | Covariance   |                       |                            |                            |                            |                            |                            |                            |                            | .001                       |

<sup>NS</sup> = NO significant \* =Significant \*\* = Highly significant.

**Table S3.** Blue Sigma®: Person, Tau B and Rho Spearman correlations. Level of significance given in brackets

| <i>Variables<br/>(Est y p-valor)</i> |              | Phenol (PH)           | NNDAB                     | NNAPH                      | Michler<br>Ketone         | Ethyl Violet               | Penta-PRS                  | Tetra-PRS                  | Tri-PRS                    | Di-PRS                     |
|--------------------------------------|--------------|-----------------------|---------------------------|----------------------------|---------------------------|----------------------------|----------------------------|----------------------------|----------------------------|----------------------------|
| Time (Month)                         | Pearson      | <b>-.512** (.006)</b> | <b>-.505** (.007)</b>     | <b>-.467* (.014)</b>       | <b>-.839** (.000)</b>     | <b>-.614** (.001)</b>      | -.340 <sup>NS</sup> (.083) | <b>-.557** (.003)</b>      | <b>-.679** (.000)</b>      | <b>.406* (.036)</b>        |
|                                      | Tau B        | <b>-.487** (.000)</b> | <b>-.468** (.001)</b>     | -.123 <sup>NS</sup> (.370) | <b>-.527** (.000)</b>     | <b>-.385** (.005)</b>      | -.208 <sup>NS</sup> (.128) | -.242 <sup>NS</sup> (.076) | <b>-.419** (.002)</b>      | <b>.397** (.006)</b>       |
|                                      | Rho Spearman | <b>-.629** (.000)</b> | <b>-.625** (.000)</b>     | -.283 <sup>NS</sup> (.153) | <b>-.675** (.000)</b>     | <b>-.542** (.004)</b>      | -.301 <sup>NS</sup> (.127) | <b>-.415* (.031)</b>       | <b>-.585** (.001)</b>      | <b>.595** (.001)</b>       |
|                                      | Covariance   | -.118                 | -.063                     | -.106                      | -.968                     | -.477                      | -2.202                     | -13.971                    | -4.128                     | 1.476                      |
| Phenol (PH)                          | Pearson      |                       | .314 <sup>NS</sup> (.111) | .283 <sup>NS</sup> (.153)  | <b>.478* (.012)</b>       | .338 <sup>NS</sup> (.085)  | .120 <sup>NS</sup> (.550)  | .090 <sup>NS</sup> (.656)  | <b>.428* (.026)</b>        | -.212 <sup>NS</sup> (.289) |
|                                      | Tau B        |                       | .143 <sup>NS</sup> (.297) | .225 <sup>NS</sup> (.100)  | <b>.402** (.003)</b>      | <b>.328* (.017)</b>        | .231 <sup>NS</sup> (.091)  | .117 <sup>NS</sup> (.393)  | <b>.373** (.006)</b>       | -.230 <sup>NS</sup> (.109) |
|                                      | Rho Spearman |                       | .240 <sup>NS</sup> (.228) | <b>.391* (.044)</b>        | <b>.567** (.002)</b>      | <b>.486* (.01)</b>         | .301 <sup>NS</sup> (.127)  | .204 <sup>NS</sup> (.308)  | <b>.545** (.003)</b>       | -.308 <sup>NS</sup> (.117) |
|                                      | Covariance   |                       | .000                      | .000                       | .000                      | .000                       | .000                       | .001                       | .001                       | .000                       |
| NNDAB                                | Pearson      |                       |                           | -.204 <sup>NS</sup> (.308) | .108 <sup>NS</sup> (.591) | -.067 <sup>NS</sup> (.742) | -.258 <sup>NS</sup> (.194) | .132 <sup>NS</sup> (.513)  | -.023 <sup>NS</sup> (.910) | <b>-.506** (.007)</b>      |
|                                      | Tau B        |                       |                           | -.200 <sup>NS</sup> (.144) | .057 <sup>NS</sup> (.677) | -.074 <sup>NS</sup> (.588) | -.160 <sup>NS</sup> (.243) | .001 <sup>NS</sup> (.999)  | -.040 <sup>NS</sup> (.770) | <b>-.463** (.001)</b>      |
|                                      | Rho Spearman |                       |                           | -.204 <sup>NS</sup> (.307) | .093 <sup>NS</sup> (.643) | -.067 <sup>NS</sup> (.742) | -.204 <sup>NS</sup> (.308) | .029 <sup>NS</sup> (.887)  | -.026 <sup>NS</sup> (.899) | <b>-.602** (.001)</b>      |
|                                      | Covariance   |                       |                           | .000                       | .000                      | .000                       | .000                       | .000                       | .000                       | .000                       |
| NNAPH                                | Pearson      |                       |                           |                            | <b>.698** (.000)</b>      | <b>.726** (.000)</b>       | <b>.701** (.000)</b>       | <b>.605** (.001)</b>       | <b>.708** (.000)</b>       | .188 <sup>NS</sup> (.347)  |
|                                      | Tau B        |                       |                           |                            | <b>.504** (.000)</b>      | <b>.578** (.000)</b>       | <b>.584** (.000)</b>       | <b>.436** (.001)</b>       | <b>.556** (.000)</b>       | .074 <sup>NS</sup> (.604)  |
|                                      | Rho Spearman |                       |                           |                            | <b>.677** (.000)</b>      | <b>.723** (.000)</b>       | <b>.779** (.000)</b>       | <b>.586** (.001)</b>       | <b>.713** (.000)</b>       | .097 <sup>NS</sup> (.631)  |
|                                      | Covariance   |                       |                           |                            | .000                      | .000                       | .001                       | .004                       | .001                       | .000                       |
| Michler Ketone                       | Pearson      |                       |                           |                            |                           | <b>.886** (.000)</b>       | <b>.725** (.000)</b>       | <b>.580** (.002)</b>       | <b>.947** (.000)</b>       | -.158 <sup>NS</sup> (.431) |
|                                      | Tau B        |                       |                           |                            |                           | <b>.789** (.000)</b>       | <b>.635** (.000)</b>       | <b>.385** (.005)</b>       | <b>.858** (.000)</b>       | -.186 <sup>NS</sup> (.194) |
|                                      | Rho Spearman |                       |                           |                            |                           | <b>.941** (.000)</b>       | <b>.837** (.000)</b>       | <b>.518** (.006)</b>       | <b>.962** (.000)</b>       | -.299 <sup>NS</sup> (.130) |
|                                      | Covariance   |                       |                           |                            |                           | .001                       | .006                       | .018                       | .007                       | -.001                      |
| Metanil Yellow                       | Pearson      |                       |                           |                            |                           | <b>.867** (.000)</b>       | <b>.801** (.000)</b>       | <b>.524** (.005)</b>       | <b>.920** (.000)</b>       | -.058 <sup>NS</sup> (.774) |
|                                      | Tau B        |                       |                           |                            |                           | <b>.766** (.000)</b>       | <b>.738** (.000)</b>       | <b>.464** (.001)</b>       | <b>.755** (.000)</b>       | -.105 <sup>NS</sup> (.462) |
|                                      | Rho Spearman |                       |                           |                            |                           | <b>.935** (.000)</b>       | <b>.911** (.000)</b>       | <b>.611** (.001)</b>       | <b>.929** (.000)</b>       | -.129 <sup>NS</sup> (.522) |
|                                      | Covariance   |                       |                           |                            |                           | .001                       | .010                       | .026                       | .011                       | .000                       |
| Penta-PRS                            | Pearson      |                       |                           |                            |                           |                            |                            | <b>.693** (.000)</b>       | <b>.842** (.000)</b>       | <b>.405* (.036)</b>        |
|                                      | Tau B        |                       |                           |                            |                           |                            |                            | <b>.487** (.000)</b>       | <b>.721** (.000)</b>       | .099 <sup>NS</sup> (.489)  |
|                                      | Rho Spearman |                       |                           |                            |                           |                            |                            | <b>.659** (.000)</b>       | <b>.877** (.000)</b>       | .101 <sup>NS</sup> (.618)  |
|                                      | Covariance   |                       |                           |                            |                           |                            |                            | .124                       | .037                       | .011                       |
| Tetra-PRS                            | Pearson      |                       |                           |                            |                           |                            |                            |                            | <b>.626** (.000)</b>       | .368 <sup>NS</sup> (.059)  |
|                                      | Tau B        |                       |                           |                            |                           |                            |                            |                            | <b>.470** (.001)</b>       | .180 <sup>NS</sup> (.209)  |
|                                      | Rho Spearman |                       |                           |                            |                           |                            |                            |                            | <b>.609** (.001)</b>       | .271 <sup>NS</sup> (.171)  |
|                                      | Covariance   |                       |                           |                            |                           |                            |                            |                            | .105                       | .037                       |
| Tri-PRS                              | Pearson      |                       |                           |                            |                           |                            |                            |                            |                            | .074 <sup>NS</sup> (.715)  |
|                                      | Tau B        |                       |                           |                            |                           |                            |                            |                            |                            | -.043 <sup>NS</sup> (.762) |
|                                      | Rho Spearman |                       |                           |                            |                           |                            |                            |                            |                            | -.102 <sup>NS</sup> (.611) |
|                                      | Covariance   |                       |                           |                            |                           |                            |                            |                            |                            | .002                       |

<sup>NS</sup> = NO significant \* =Significant \*\* = Highly significant.

**Table S4.** Black Sigma®: Person, Tau B and Rho Spearman correlations. Level of significance given in brackets

|                    |         | Phenol (PH)               | NNDAB          | NNAPH                      | Michler Ketone            | Victoria Blue R | Penta-PRS                 | Tetra-PRS                 | Tri-PRS                   | Di-PRS                    | Mono-PRS                   |
|--------------------|---------|---------------------------|----------------|----------------------------|---------------------------|-----------------|---------------------------|---------------------------|---------------------------|---------------------------|----------------------------|
| Time<br>(Month)    | Pearson | -.342 <sup>NS</sup> (.07) | -.609** (.000) | -.525** (.003)             | -.941** (.000)            | -.968** (.000)  | -.848** (.000)            | -.757** (.000)            | -.382* (.041)             | -.586** (.001)            | -.378* (.043)              |
|                    | Tau B   | -.739** (.000)            | -.542** (.000) | -.246 <sup>NS</sup> (.061) | -.704** (.000)            | -.872** (.000)  | -.798** (.000)            | -.631** (.000)            | -.236 (.072)              | -.458** (.000)            | -.236 <sup>NS</sup> (.072) |
|                    | Rho     | -.908** (.000)            | -.717** (.000) | -.407* (.028)              | -.836** (.000)            | -.964** (.000)  | -.915** (.000)            | -.818** (.000)            | -.384* (.040)             | -.630** (.000)            | -.384* (.040)              |
|                    | Cov.    | -.180                     | -.040          | -.074                      | -.563                     | -.1113          | -.11.871                  | -.1564                    | -.428                     | -.827                     | -.426                      |
| Phenol<br>(PH)     | Pearson |                           | .531** (.003)  | .157 <sup>NS</sup> (.417)  | .232 <sup>NS</sup> (.226) | .386* (.039)    | .444* (.016)              | .270 <sup>NS</sup> (.157) | .052 <sup>NS</sup> (.790) | .157 <sup>NS</sup> (.416) | .050 <sup>NS</sup> (.796)  |
|                    | Tau B   |                           | .448** (.001)  | .310* (.018)               | .621** (.000)             | .759** (.000)   | .773** (.000)             | .724** (.000)             | .379** (.004)             | .552** (.000)             | .379** (.004)              |
|                    | Rho     |                           | .632** (.000)  | .478** (.009)              | .826** (.000)             | .926** (.000)   | .933** (.000)             | .877** (.000)             | .557** (.002)             | .730** (.000)             | .557** (.002)              |
|                    | Cov.    |                           | .000           | .000                       | .000                      | .000            | .003                      | .000                      | .000                      | .000                      | .000                       |
| NNDAB              | Pearson |                           |                | .065 <sup>NS</sup> (.737)  | .394* (.035)              | .599** (.001)   | .791** (.000)             | .535** (.003)             | .168 <sup>NS</sup> (.384) | .348 <sup>NS</sup> (.064) | .175 <sup>NS</sup> (.363)  |
|                    | Tau B   |                           |                | .034 <sup>NS</sup> (.793)  | .335* (.011)              | .493** (.000)   | .507** (.000)             | .409** (.002)             | .281* (.032)              | .345** (.009)             | .281* (.032)               |
|                    | Rho     |                           |                | .028 <sup>NS</sup> (.885)  | .530** (.003)             | .688** (.000)   | .690** (.000)             | .598** (.001)             | .362 <sup>NS</sup> (.054) | .467* (.011)              | .362 <sup>NS</sup> (.054)  |
|                    | Cov.    |                           |                | .000                       | .000                      | .000            | .001                      | .000                      | .000                      | .000                      | .000                       |
| NNAPH              | Pearson |                           |                |                            | .651** (.000)             | .597** (.001)   | .355 <sup>NS</sup> (.059) | .347 <sup>NS</sup> (.065) | .159 <sup>NS</sup> (.411) | .271 <sup>NS</sup> (.155) | .150 <sup>NS</sup> (.436)  |
|                    | Tau B   |                           |                |                            | .315* (.016)              | .345** (.009)   | .261* (.047)              | .310* (.018)              | .182 <sup>NS</sup> (.165) | .335* (.011)              | .182 <sup>NS</sup> (.165)  |
|                    | Rho     |                           |                |                            | .477** (.009)             | .501** (.006)   | .411* (.027)              | .456* (.013)              | .218 <sup>NS</sup> (.257) | .417* (.024)              | .218 <sup>NS</sup> (.257)  |
|                    | Cov.    |                           |                |                            | .000                      | .000            | .001                      | .000                      | .000                      | .000                      | .000                       |
| Michler<br>Ketone  | Pearson |                           |                |                            |                           | .940** (.000)   | .711** (.000)             | .755** (.000)             | .484** (.008)             | .648** (.000)             | .478** (.009)              |
|                    | Tau B   |                           |                |                            |                           | .773** (.000)   | .581** (.000)             | .709** (.000)             | .483** (.000)             | .626** (.000)             | .483** (.000)              |
|                    | Rho     |                           |                |                            |                           | .892** (.000)   | .765** (.000)             | .879** (.000)             | .691** (.000)             | .830** (.000)             | .691** (.000)              |
|                    | Cov.    |                           |                |                            |                           | .001            | .006                      | .001                      | .000                      | .001                      | .000                       |
| Victoria<br>Blue R | Pearson |                           |                |                            |                           |                 | .881** (.000)             | .798** (.000)             | .423* (.022)              | .627** (.000)             | .420* (.023)               |
|                    | Tau B   |                           |                |                            |                           |                 | .778** (.000)             | .729** (.000)             | .335* (.011)              | .557** (.000)             | .335* (.011)               |
|                    | Rho     |                           |                |                            |                           |                 | .928** (.000)             | .893** (.000)             | .530** (.003)             | .743** (.000)             | .530** (.003)              |
|                    | Cov.    |                           |                |                            |                           |                 | .014                      | .002                      | .001                      | .001                      | .001                       |
| Penta-<br>PRS      | Pearson |                           |                |                            |                           |                 |                           | .812** (.000)             | .407* (.028)              | .600** (.001)             | .404* (.030)               |
|                    | Tau B   |                           |                |                            |                           |                 |                           | .685** (.000)             | .320* (.015)              | .483** (.000)             | .320* (.015)               |
|                    | Rho     |                           |                |                            |                           |                 |                           | .859** (.000)             | .476** (.009)             | .670** (.000)             | .476** (.009)              |
|                    | Cov.    |                           |                |                            |                           |                 |                           | .024                      | .006                      | .012                      | .006                       |
| Tetra-<br>PRS      | Pearson |                           |                |                            |                           |                 |                           |                           | .854** (.000)             | .951** (.000)             | .852** (.000)              |
|                    | Tau B   |                           |                |                            |                           |                 |                           |                           | .586** (.000)             | .788** (.000)             | .586** (.000)              |
|                    | Rho     |                           |                |                            |                           |                 |                           |                           | .773** (.000)             | .926** (.000)             | .773** (.000)              |
|                    | Cov.    |                           |                |                            |                           |                 |                           |                           | .002                      | .003                      | .002                       |
| Tri-PRS            | Pearson |                           |                |                            |                           |                 |                           |                           |                           | .966** (.000)             | .999** (.000)              |
|                    | Tau B   |                           |                |                            |                           |                 |                           |                           |                           | .778** (.000)             | .999** (.000)              |
|                    | Rho     |                           |                |                            |                           |                 |                           |                           |                           | .916** (.000)             | .999** (.000)              |
|                    | Cov.    |                           |                |                            |                           |                 |                           |                           |                           | .002                      | .001                       |
| Di-PRS             | Pearson |                           |                |                            |                           |                 |                           |                           |                           |                           | .967** (.000)              |
|                    | Tau B   |                           |                |                            |                           |                 |                           |                           |                           |                           | .778** (.000)              |
|                    | Rho     |                           |                |                            |                           |                 |                           |                           |                           |                           | .916** (.000)              |
|                    | Cov.    |                           |                |                            |                           |                 |                           |                           |                           |                           | .002                       |

<sup>NS</sup> = NO significant \* =Significant \*\* = Highly significant.
